# Supplementary material for: Genetic Variants of Gonadotropins and Their Receptors Could Influence Controlled Ovarian Stimulation: IVF Data from a Prospective Multicenter Study
Source: MDPI journal article supplement (doi:10.3390/genes14061269), 2023-06-15
Supplement: s1 [file s1]

**Supplemental Table S1:** Treatment outcomes. Patients stratified according to the rs LHCGR intronic polymorphism (rs4073366).

|                                               | Homozygous C/C | Heterozygous C/G | Homozygous G/G  | <i>p-value</i> |
|-----------------------------------------------|----------------|------------------|-----------------|----------------|
| Total FSH doses (IU)                          | 1751.42±565.69 | 1661.43±441.10   | 1800.00±150.00  | 0.732          |
| FSH/oocytes                                   | 300.74±215.01  | 286.65±194.49    | 214.29±90.91    | 0.826          |
| Days of stimulation                           | 11.18±1.63     | 11.29±1.88       | 12.00±1.00      | 0.705          |
| Endometrial thickness (mm)                    | 9.93±1.54      | 10.46±2.12       | 11.05±2.76      | 0.525          |
| Estradiol at the day of hCG (pg/mL)           | 1555.90±765.64 | 1876.68±1112.63  | 1200.00±1000.00 | 0.303          |
| Follicles ≥ 16mm at the of day of HCG         | 7.82±2.93      | 7.36±3.71        | 9.00±1.73       | 0.632          |
| Oocyte number                                 | 9.56±4.10      | 9.38±3.41        | 9.67±2.31       | 0.975          |
| Mature oocyte number                          | 7.74±3.40      | 7.78±3.49        | 9.00±2.83       | 0.878          |
| Oocytes inseminated                           | 5.24±3.49      | 5.41±3.56        | 7.00±4.00       | 0.696          |
| Oocytes fertilized                            | 3.60±2.61      | 3.38±2.14        | 6.00±4.58       | 0.241          |
| Oocytes cryopreserved                         | 0.35±1.37      | 0.38±1.42        | 0.00±0.00       | 0.901          |
| Embryos cryopreserved                         | 0.95±1.81      | 1.10±2.01        | 1.00±1.73       | 0.937          |
| Embryos transferred                           | 1.69±0.84      | 1.59±0.73        | 1.33±0.58       | 0.662          |
| Implantation rate                             | 32/104         | 10/46            | 1/4             | 0.348          |
| Pregnancy rate per embryo transferred         | 33/104         | 13/46            | 1/4             | 0.816          |
| Ongoing pregnancy rate per embryo transferred | 29/104         | 9/46             | 1/4             | 0.381          |
| Pregnancy rate per cycle                      | 33/62          | 13/29            | 1/3             | 0.563          |
| Ongoing pregnancy rate per cycle              | 29/104         | 9/29             | 1/3             | 0.656          |
