# Supplementary material for: Genetic Variants of Gonadotropins and Their Receptors Could Influence Controlled Ovarian Stimulation: IVF Data from a Prospective Multicenter Study
Source: MDPI journal article supplement (doi:10.3390/genes14061269), 2023-06-15
Supplement: s1 [file s1]

**Supplemental Table S3:** Treatment outcomes in patients stratified according to the rs FSHB 2623 (rs6169) polymorphism.

|                                                  | <b>Homozygous<br/>T/T</b> | <b>Heterozygous<br/>T/C</b> | <b>Homozygous<br/>C/C</b> | <b><i>p</i>-<br/>value</b> |
|--------------------------------------------------|---------------------------|-----------------------------|---------------------------|----------------------------|
| Total FSH doses (IU)                             | 1777.94±510.79            | 1677.91±513.57              | 1782.50±550.64            | 0.648                      |
| FSH/oocytes                                      | 300.14±310.68             | 287.17±175.63               | 301.22±179.14             | 0.958                      |
| Days of stimulation                              | 10.88±1.41                | 11.12±1.45                  | 11.69±2.03                | 0.240                      |
| Endometrial thickness (mm)                       | 10.30±0.91                | 9.97±1.77                   | 10.31±2.06                | 0.844                      |
| Estradiol on the day of hCG<br>(pg/mL)           | 1085.42±679.11            | 1679.86±789.85              | 1929.95±895.59            | 0.300                      |
| Follicles ≥ 16mm on the day<br>of hCG            | 8.29±3.51                 | 7.72±2.96                   | 7.35±3.32                 | 0.633                      |
| Oocyte number                                    | 10.24±4.26                | 9.16±3.58                   | 9.73±4.04                 | 0.572                      |
| Mature oocyte number                             | 8.53±3.52                 | 7.55±3.23                   | 7.73±3.63                 | 0.629                      |
| Oocytes inseminated                              | 5.88±4.06                 | 4.80±3.12                   | 6.08±3.75                 | 0.254                      |
| Oocytes fertilized                               | 4.24±3.03                 | 3.27±2.23                   | 3.85±2.81                 | 0.350                      |
| Oocytes cryopreserved                            | 0.29±1.21                 | 0.22±1.08                   | 0.65±1.85                 | 0.405                      |
| Embryos cryopreserved                            | 1.53±2.24                 | 0.67±1.27                   | 1.31±2.40                 | 0.152                      |
| Embryos transferred                              | 1.71±0.92                 | 1.67±0.82                   | 1.58±0.70                 | 0.854                      |
| Implantation rate                                | 12/29                     | 19/84                       | 12/41                     | 0.922                      |
| Pregnancy rate per embryo<br>transferred         | 12/29                     | 21/84                       | 14/41                     | 0.933                      |
| Ongoing pregnancy rate per<br>embryo transferred | 10/29                     | 17/84                       | 12/41                     | 0.821                      |
| Pregnancy rate per cycle                         | 12/17                     | 21/51                       | 14/26                     | 0.436                      |
| Ongoing pregnancy rate per<br>cycle              | 10/17                     | 17/51                       | 12/26                     | 0.617                      |
