# Supplementary material for: Genetic Variants of Gonadotropins and Their Receptors Could Influence Controlled Ovarian Stimulation: IVF Data from a Prospective Multicenter Study
Source: MDPI journal article supplement (doi:10.3390/genes14061269), 2023-06-15
Supplement: s1 [file s1]

**Supplemental Table S2:** Treatment outcomes in patients stratified according to the LHCGR 312 (rs2293275) polymorphism.

|                                               | Homozygous T/T | Heterozygous T/C | Homozygous C/C | <i>p-value</i> |
|-----------------------------------------------|----------------|------------------|----------------|----------------|
| Total FSH doses (IU)                          | 1807.00±667.15 | 1703.23±451.24   | 1713.54±533.65 | 0.788          |
| FSH/oocytes                                   | 322.28±169.80  | 241.81±164.53    | 329.30±246.56  | 0.195          |
| Days of stimulation                           | 11.18±1.78     | 11.29±1.68       | 11.20±1.71     | 0.960          |
| Endometrial thickness (mm)                    | 10.08±2.73     | 10.08±1.46       | 10.32±1.49     | 0.925          |
| Estradiol at the day of hCG (pg/mL)           | 1773.50±645.43 | 1731.31±1104.56  | 1523.77±748.41 | 0.571          |
| Follicles ≥ 16mm at the day of hCG            | 7.12±3.43      | 7.24±2.75        | 8.57±3.35      | 0.127          |
| Oocyte number                                 | 8.47±2.98      | 9.86±4.11        | 9.60±3.84      | 0.449          |
| Mature oocyte number                          | 7.29±3.60      | 8.72±3.29        | 7.15±3.27      | 0.136          |
| Oocytes inseminated                           | 5.53±3.52      | 5.93±3.87        | 4.57±2.91      | 0.233          |
| Oocytes fertilized                            | 3.29±2.52      | 4.05±3.10        | 3.23±1.68      | 0.324          |
| Oocytes cryopreserved                         | 0.00±0.00      | 0.14±0.93        | 0.77±1.93      | 0.063          |
| Embryos cryopreserved                         | 1.24±2.11      | 1.10±2.02        | 0.77±1.50      | 0.636          |
| Embryos transferred                           | 1.41±0.87      | 1.55±0.67        | 1.89±0.87      | 0.071          |
| Implantation rate                             | 4/23           | 16/65            | 23/66          | 0.192          |
| Pregnancy rate per embryo transferred         | 5/24           | 19/65            | 23/66          | 0.311          |
| Ongoing pregnancy rate per embryo transferred | 3/24           | 15/65            | 21/66          | 0.118          |
| Pregnancy rate per cycle                      | 5/17           | 19/42            | 23/35          | 0.408          |
| Ongoing pregnancy rate per cycle              | 3/17           | 15/42            | 21/35          | 0.292          |
