# Supplementary material for: Genetic Variants of Gonadotropins and Their Receptors Could Influence Controlled Ovarian Stimulation: IVF Data from a Prospective Multicenter Study
Source: MDPI journal article supplement (doi:10.3390/genes14061269), 2023-06-15
Supplement: s1 [file s1]

**Supplemental Table S4:** Treatment outcomes in patients stratified according to the LHB (rs1800447) polymorphism.

|                                               | T/T            | T/C             | <i>p-value</i> |
|-----------------------------------------------|----------------|-----------------|----------------|
| Total FSH doses (IU)                          | 1766.44±557.28 | 1579.37±329.68  | 0.157          |
| FSH/oocytes                                   | 301.90±214.61  | 266.76±171.73   | 0.526          |
| Days of stimulation                           | 11.37±1.78     | 10.75±1.21      | 0.147          |
| Endometrial thickness (mm)                    | 10.24±1.43     | 9.84±2.75       | 0.563          |
| Estradiol on the day of hCG (pg/mL)           | 1586.26±860.00 | 1941.33±1011.35 | 0.170          |
| Follicles ≥ 16mm on the of hCG                | 7.47±3.02      | 8.65±3.51       | 0.137          |
| Oocyte number                                 | 9.41±3.61      | 9.90±4.62       | 0.610          |
| Mature oocyte number                          | 7.69±3.21      | 8.11±4.07       | 0.646          |
| Oocytes inseminated                           | 5.30±3.17      | 5.55±4.59       | 0.776          |
| Oocytes fertilized                            | 3.47±2.33      | 4.10±3.27       | 0.333          |
| Oocytes cryopreserved                         | 0.22±1.06      | 0.85±2.08       | 0.064          |
| Embryos cryopreserved                         | 0.81±1.59      | 1.70±2.51       | 0.056          |
| Embryos transferred                           | 1.69±0.86      | 1.50±0.51       | 0.350          |
| Implantation rate                             | 35/126         | 8/28            | 0.822          |
| Pregnancy rate per embryo transferred         | 36/126         | 11/28           | 0.375          |
| Ongoing pregnancy rate per embryo transferred | 32/126         | 7/28            | 0.844          |
| Pregnancy rate per cycle                      | 36/75          | 11/19           | 0.607          |
| Ongoing pregnancy rate per cycle              | 32/75          | 7/19            | 0.842          |
